# Supplementary material for: Evaluation of the Combined Use of Optic Nerve Sheath Diameter and the FOUR Score in Predicting Brain Death in Patients with Severe Brain Injury Admitted to the Intensive Care Unit
Source: Research Square preprint supplement (doi:10.21203/rs.3.rs-8732205/v1), 2026-02-22
Supplement: Supplementary file 1 [file 07986e3c1e7361b7c4c937c8.docx]

| **Optic nerve sheath diameter (mm)** | **Score** |
| --- | --- |
| ≤5.0 | 4 |
| 5.1–5.5 | 3 |
| 5.6–6.0 | 2 |
| 6.1–6.5 | 1 |
| >6.5 | 0 |

**Supplementary Table 1. Modified FOUR score incorporating optic nerve sheath diameter**
